# Supplementary material
Source: PubMed Central journal article supplement (PMC6902101)
Supplement: jamaoncol-6-75-s001.pdf [file jamaoncol-6-75-s001.pdf]

## Supplementary Online Content

Arthur DW, Winter KA, Kuerer HM, et al. Effectiveness of breast-conserving surgery and 3-dimensional conformal partial breast reirradiation for recurrence of breast cancer in the ipsilateral breast: the NRG Oncology/RTOG 104 phase 2 clinical trial. *JAMA Oncol*. Published online November 21, 2019. doi:10.1001/jamaoncol.2019.4320

**eTable 1.** Original Whole Breast Dose

**eTable 2.** Circulating Tumor Cell Analysis

This supplementary material has been provided by the authors to give readers additional information about their work.

### 3 Yr Efficacy - Partial Breast Re-Irradiation

**eTable 1.** Original Whole Breast Dose

|                                                |             |
|------------------------------------------------|-------------|
| Details of Previous Whole Breast RT Available? |             |
| Yes                                            | 51 (87.9%)  |
| No                                             | 7 (12.1%)   |
|                                                |             |
| RT Total Dose to Whole Breast (Gy)             | n=51        |
| Median                                         | 50.4        |
| Min-Max                                        | 45.0 - 61.2 |
|                                                |             |
| RT Fraction Size                               | n=51        |
| Median                                         | 1.8         |
| Min-Max                                        | 1.5 - 2.25  |
|                                                |             |
| RT Total Fraction Count                        | n=51        |
| Median                                         | 27          |
| Min-Max                                        | 23 - 36     |
|                                                |             |
| Did the Patient Receive a Boost?               | n=51        |
| No                                             | 10 (19.6%)  |
| Yes                                            | 41 (80.4%)  |
|                                                |             |

### 3 Yr Efficacy - Partial Breast Re-Irradiation

**eTable 2.** Circulating Tumor Cell Analysis

|                                                                           |                |            |              |
|---------------------------------------------------------------------------|----------------|------------|--------------|
| <b>Total eligible patients</b>                                            | <b>58</b>      |            |              |
| Consented to Circulating Tumor Cells                                      | <b>47</b>      | <b>81%</b> |              |
| Paired Circulating Tumor Cells*                                           | <b>31</b>      | <b>66%</b> |              |
| <b>Pre-Tx</b>                                                             |                |            |              |
| Detectable                                                                | <b>8</b>       | <b>20%</b> |              |
| Undetectable                                                              | <b>32</b>      | <b>80%</b> |              |
| Unevaluable                                                               | <b>7</b>       | <b>---</b> |              |
| <b>Post-Tx</b>                                                            |                |            |              |
| Detectable                                                                | <b>8</b>       | <b>24%</b> |              |
| Undetectable                                                              | <b>26</b>      | <b>76%</b> |              |
| Unevaluable                                                               | <b>13</b>      | <b>---</b> |              |
| <b>*For Patients with Both Pre and Post-Treatment CTC Analysis (n=31)</b> |                |            |              |
|                                                                           | <b>Post-Tx</b> |            |              |
| <b>Pre-Tx</b>                                                             | Undetectable   | Detectable | <b>Total</b> |
| Undetectable                                                              | 21 (67.7%)     | 5 (16.1%)  | 26 (83.9%)   |
| Detectable                                                                | 3 (9.7%)       | 2 (6.5%)   | 5 (16.1%)    |
| <b>Total</b>                                                              | 24 (77.4%)     | 7 (22.6%)  | 31 (100.0%)  |
